# Supplementary material for: Peculiar electronic and vibrational properties of metal–dithiolenes (Ni, Au) based on 1,2,5-thiadiazole-3,4-dithiolato
Source: Royal Society of Chemistry journal article supplement (doi:10.1039/b812214h), 2008-11-18
Supplement: b812214h.pdf [file b812214h.pdf]

## **Supporting Information**

# Peculiar Electronic and Vibrational Properties of Metal- Dithiolenes (Ni, Au) Based on 1,2,5-Thiadiazole-3,4- Dithiolato

*Giuseppe Bruno, Manuel Almeida, Dulce Simão, Maria Laura Mercuri, Luca Pilia,*

*Angela Serpe and Paola Deplano*

**Table S1. IR<sup>a</sup> and Raman<sup>b</sup> peaks (cm<sup>-1</sup>) of [M(tdas)<sub>2</sub>]<sup>z-</sup> salts [M= Ni(II), z = 1 (1) or 2 (2); Au(III), z = 1 (3)].**

| (Bu <sub>4</sub> N)[Ni(tdas) <sub>2</sub> ] (1)                                                                                                              |                                                                                                                                                                      | (Bu <sub>4</sub> N) <sub>2</sub> [Ni(tdas) <sub>2</sub> ] (2)                                                                                                       |                                                                                                                                                                       | (Bu <sub>4</sub> N)[Au(tdas) <sub>2</sub> ] (3)                                                                                                         |                                                                                                                                        |
|--------------------------------------------------------------------------------------------------------------------------------------------------------------|----------------------------------------------------------------------------------------------------------------------------------------------------------------------|---------------------------------------------------------------------------------------------------------------------------------------------------------------------|-----------------------------------------------------------------------------------------------------------------------------------------------------------------------|---------------------------------------------------------------------------------------------------------------------------------------------------------|----------------------------------------------------------------------------------------------------------------------------------------|
| IR                                                                                                                                                           | RAMAN                                                                                                                                                                | IR                                                                                                                                                                  | RAMAN                                                                                                                                                                 | IR                                                                                                                                                      | RAMAN                                                                                                                                  |
| 2959m, 2929m,<br>2872m<br>1470s<br><br>1404w<br>1381w<br>1322s<br>1237vs<br>1169w<br>1020vw<br>921w, 882mw,<br>784 ms<br>769ms, 752ms<br>736ms<br>503m, 490m | 2989m, 2928m,<br>2868m<br><br>1443w<br>1406mw<br><br>1323vs<br>n.o.*<br><br><i>1070-1053vwbr</i><br>909w<br><br>765m<br><br>486m<br><br>382w, 326vs<br>255mw<br>157s | 2958m, 2929m,<br>2870m<br>1490m, 1478m<br>1462m<br>1408w<br>1382m<br>1321vs<br>1251w, 1224vs,<br>1174w, 1148w<br>1025m<br>882m, 781m<br><br>764ms,<br>734mw<br>488m | 2989m, 2929ms,<br>2969m<br><br>1445 w<br>1406w<br><br>1322vs<br>1243mw<br>1148w<br><i>1070-1053vwbr</i><br><br>765mw<br><br>485w<br><br>385m, 326ms<br>266mw<br>157ms | 2954ms, 2863ms<br><br>1482 m<br>1458 m<br><br>1377m<br>1316vs<br>1243vs<br><br>1019m, 1000sh<br>872m, 782m<br><br>788sm<br>735m<br>503m, 495mw,<br>475w | 2930 broad<br><br><br><br><br><br>1319s<br>1252w<br><br><i>1070-1050vwbr</i><br><br>793m<br>732m<br><br>388m, 368vs<br>254mw<br>154 vs |

<sup>a</sup>Spectra recorded on KBr pellets. <sup>b</sup>Spectra recorded on solid samples mixed with KBr. \*not observed in the solid state, 1243s in CH<sub>2</sub>Cl<sub>2</sub> solution.

**Table S2. List of calculated wavenumbers of  $[\text{M}(\text{tdas})_2]^{0,1-,2-}$  (employed techniques: B3LYP/6-311+G(2df) for Ni and : B3LYP/SDD for Au)**

**$[\text{Ni}(\text{tdas})_2]^0$**

| $\nu_{\text{n}^\circ}$ | $\text{cm}^{-1}$ | $I_{\text{ir}}$ | $I_{\text{Ra}}$ | Symm. | Mode Assignment                           |
|------------------------|------------------|-----------------|-----------------|-------|-------------------------------------------|
| 5                      | 162              | 0               | 140             | Ag    | $\delta(\text{SMS})$                      |
| 9                      | 213              | 0               | 2.6             | B1g   | v(2MS) sy                                 |
| 11                     | 269              | 0               | 1.7             | B2g   | batterfly wag                             |
| 13                     | 321              | 12.6            | 0               | B2u   | v(MS) asy                                 |
| 14                     | 346              | 0               | 125             | Ag    | v(4MS) sy                                 |
| 15                     | 389              | 0               | 26              | B3g   | ring vibrations                           |
| 18                     | 485              | 0               | 29.4            | B1g   | ring vibrations                           |
| 19                     | 495              | 100             | 0               | B3u   | $\delta(\text{SMS}) + \delta(\text{NSN})$ |
| 20                     | 504              | 0               | 16.9            | Ag    | $\delta(\text{SMS}) + \delta(\text{NSN})$ |
| 22                     | 528              | 23.7            | 0               | B3u   | rings wag                                 |
| 27                     | 764              | 0               | 2.2             | Ag    | $\delta(\text{NSN})$                      |
| 28                     | 841              | 117             | 0               | B1u   | v(4NS) asy                                |
| 29                     | 844              | 0               | 701             | Ag    | v(4NS) sy                                 |
| 30                     | 846              | 0               | 51.8            | B1g   | v(2NS) sy                                 |
| 31                     | 847              | 70.9            | 0               | B2u   | v(2NS) asy                                |
| 32                     | 1064             | 0.1             | 0               | B2u   | v(2CS) asy                                |
| 33                     | 1067             | 0               | 3.1             | B1g   | v(2CS) sy                                 |
| 34                     | 1212             | 295             | 0               | B3u   | v(CC) asy                                 |
| 35                     | 1238             | 0               | 2460            | Ag    | v(CC) sy                                  |
| 36                     | 1283             | 40.4            | 0               | B3u   | v(4CN) asy                                |
| 37                     | 1297             | 0               | 37              | Ag    | v(4CN) sy                                 |
| 38                     | 1390             | 0               | 162             | B1g   | v(2CN) sy                                 |
| 39                     | 1392             | 9.5             | 0               | B2u   | v(2CN) asy                                |

**$[\text{Ni}(\text{tdas})_2]^{1-}$**

| $\nu_{\text{n}^\circ}$ | $\text{cm}^{-1}$ | $I_{\text{ir}}$ | $I_{\text{Ra}}$ | Symm. | Mode Assignment      |
|------------------------|------------------|-----------------|-----------------|-------|----------------------|
| 5                      | 155              | 0               | 41              | Ag    | $\delta(\text{SMS})$ |

|    |      |     |      |     |                                           |
|----|------|-----|------|-----|-------------------------------------------|
| 9  | 188  | 0   | 57   | B1g | v(2MS) sy                                 |
| 10 | 258  | 0   | 2.8  | B2g | batterfly wag                             |
| 13 | 313  | 19  | 0    | B2u | v(MS) asy                                 |
| 14 | 339  | 0   | 66   | Ag  | v(4MS) sy                                 |
| 15 | 372  | 29  | 0    | B3u | v(2MS) asy                                |
| 18 | 477  | 0   | 36   | B1g | ring vibrations                           |
| 19 | 485  | 17  | 0    | B3u | ring vibrations                           |
| 20 | 490  | 0   | 450  | Ag  | $\delta(\text{SMS}) + \delta(\text{NSN})$ |
| 23 | 511  | 21  | 0    | B1u | rings wag                                 |
| 26 | 751  | 6.2 | 0    | B3u | $\delta(\text{NSN})$                      |
| 27 | 752  | 0   | 18   | Ag  | $\delta(\text{NSN})$                      |
| 28 | 788  | 184 | 0    | B3u | v(2NS) sy                                 |
| 29 | 790  | 0   | 159  | Ag  | v(4NS) sy                                 |
| 30 | 797  | 0   | 53   | B1g | v(2NS) sy                                 |
| 31 | 798  | 43  | 0    | B2u | v(2NS) asy                                |
| 32 | 1039 | 0   | 134  | B1g | v(2CS) sy                                 |
| 33 | 1041 | 1.4 | 0    | B2u | v(2CS) asy                                |
| 34 | 1227 | 0   | 8276 | Ag  | v(CC) sy                                  |
| 35 | 1230 | 69  | 0    | B3u | v(CC) asy                                 |
| 36 | 1331 | 0   | 2986 | Ag  | v(4CN) sy                                 |
| 37 | 1332 | 1   | 0    | B3u | v(4CN) asy                                |
| 39 | 1446 | 1.9 | 0    | B2u | v(2CN) asy                                |

### **[Ni(tdas)<sub>2</sub>]<sup>2-</sup>**

| $\nu_{\text{no}}$ | $\text{cm}^{-1}$ | $I_{\text{ir}}$ | $I_{\text{Ra}}$ | Symm. | Mode Assignment                           |
|-------------------|------------------|-----------------|-----------------|-------|-------------------------------------------|
| 5                 | 148              | 0               | 19              | Ag    | $\delta(\text{SMS})$                      |
| 10                | 254              | 0               | 2.6             | B2g   | batterfly wag                             |
| 13                | 306              | 10.4            | 0               | B2u   | v(MS) asy                                 |
| 14                | 315              | 0               | 57              | Ag    | v(4MS) sy                                 |
| 15                | 327              | 35              | 0               | B3u   | (2MS) asy                                 |
| 16                | 383              | 0               | 3.4             | B1g   | v(2MS) sy                                 |
| 19                | 485              | 4.2             | 0               | B3u   | ring vibrations                           |
| 20                | 488              | 0               | 2.4             | B2g   | rings wag                                 |
| 21                | 489              | 0               | 7.3             | Ag    | $\delta(\text{SMS}) + \delta(\text{NSN})$ |
| 23                | 491              | 17.7            | 0               | B1u   | rings wag                                 |
| 26                | 737              | 18.4            | 0               | B3u   | $\delta(\text{NSN})$                      |
| 27                | 738              | 0               | 4.3             | Ag    | $\delta(\text{NSN})$                      |
| 28                | 754              | 202             | 0               | B3u   | v(2NS) sy                                 |
| 29                | 757              | 0               | 7.9             | Ag    | v(4NS) sy                                 |

|    |      |      |      |     |            |
|----|------|------|------|-----|------------|
| 30 | 763  | 0    | 0.5  | B1g | v(2NS) sy  |
| 31 | 764  | 30.7 | 0    | B2u | v(2NS) asy |
| 32 | 1036 | 24.2 | 0    | B2u | v(2CS) asy |
| 33 | 1037 | 0    | 2.7  | B1g | v(2CS) sy  |
| 34 | 1205 | 490  | 0    | B3u | v(CC) asy  |
| 35 | 1210 | 0    | 34.5 | Ag  | v(CC) asy  |
| 36 | 1361 | 407  | 0    | B3u | v(2CN) asy |
| 37 | 1364 | 0    | 703  | Ag  | v(4CN) sy  |
| 38 | 1441 | 0    | 46.2 | B1g | v(2CN) sy  |
| 39 | 1445 | 21.2 | 0    | B2u | v(2CN) asy |

**[Au(tdas)<sub>2</sub>]<sup>1-</sup>**

| $\nu_n^\circ$ | cm <sup>-1</sup> | I <sub>ir</sub> | I <sub>Ra</sub> | Symm. | Mode Assignment |
|---------------|------------------|-----------------|-----------------|-------|-----------------|
| 6             | 138              | 0               | 70              | Ag    | δ(SMS)          |
| 10            | 231              | 0               | 6.4             | B1g   | v(2MS) sy       |
| 11            | 245              | 0               | 3.8             | B2g   | batterfly wag   |
| 14            | 345              | 0               | 52              | Ag    | v(4MS) sy       |
| 15            | 360              | 35              | 0               | B2u   | v(MS) asy       |
| 16            | 370              | 0               | 27              | B1g   | v(2MS) sy       |
| 17            | 400              | 1.0             | 0               | B3u   | v(2MS) asy      |
| 20            | 458              | 0               | 5.9             | B1g   | δ(SMS) + δ(NSN) |
| 22            | 469              | 24.4            | 0               | B1u   | rings wag       |
| 23            | 472              | 11.9            | 0               | B2u   | ring vibrations |
| 24            | 636              | 0               | 5.2             | B1g   | v(2NS) sy       |
| 26            | 700              | 6.4             | 0               | B3u   | δ(NSN)          |
| 27            | 701              | 0               | 100.5           | Ag    | δ(NSN)          |
| 28            | 722              | 180             | 0               | B3u   | δ(NSN)          |
| 30            | 723              | 0               | 101.5           | Ag    | v(4NS) sy       |
| 33            | 1021             | 0               | 7.8             | B1g   | v(2CS) sy       |
| 34            | 1226             | 360             | 0               | B3u   | v(CC) asy       |
| 35            | 1230             | 0               | 18.9            | Ag    | v(CC) sy        |
| 36            | 1423             | 262             | 0               | B3u   | v(2CN) asy      |
| 37            | 1426             | 0               | 147             | Ag    | v(4CN) sy       |

**Table S3.**  $[\text{Ni}(\text{tdas})_2]^0$  (0)

| MO#     |                                                                                     | Symm   | E        |
|---------|-------------------------------------------------------------------------------------|--------|----------|
| LUMO+3  | 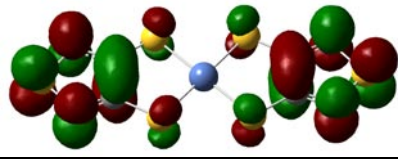   | 7 B2g  | -0.08445 |
| LUMO +2 |    | 8 B1u  | -0.09136 |
| LUMO +1 |    | 14 B1g | -0.12971 |
| LUMO    |    | 6 B2g  | -0.20235 |
| HOMO    |   | 7 B1u  | -0.26249 |
| HOMO-1  |  | 4 B3g  | -0.26813 |
| HOMO-2  |  | 3 Au   | -0.27447 |
| HOMO-3  |  | 22 Ag  | -0.30193 |
| HOMO-4  |  | 15 B2u | -0.30365 |

|        |                                                                                   |                    |          |
|--------|-----------------------------------------------------------------------------------|--------------------|----------|
| HOMO-5 | 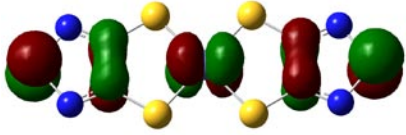 | 5 B <sub>2g</sub>  | -0.31077 |
| HOMO-6 |  | 19 B <sub>3u</sub> | -0.31282 |
| HOMO-7 |  | 21 A <sub>g</sub>  | -0.33045 |
| HOMO-8 |  | 13 B <sub>1g</sub> | -0.33747 |

**Table S4.**  $[\text{Ni}(\text{tdas})_2]^{1-}$  (1)

| MO#n     |                                                                                     | Symm   | E alfa        | E beta               | Symm   |
|----------|-------------------------------------------------------------------------------------|--------|---------------|----------------------|--------|
| LUMO +2  | 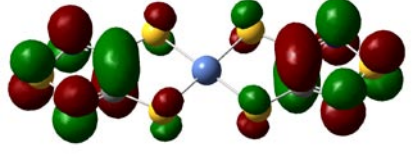   | 7 B2g  | 0.04637       | 0.05115              | 7 B2g  |
| LUMO +1  |    | 8 B1u  | 0.03966       | 0.04321              | 8 B1u  |
| LUMO     |    | 14 B1g | -0.00305      | 0.00964              | 13 B1g |
| SOMO     |    | 6 B2g  | -0.10624<br>↑ | -0.04493<br>(LUMO β) | 6 B2g  |
| HOMO *   |  | 7 B1u  | -0.13419<br>↑ | -0.12279<br>↓        | 4 B3g  |
| HOMO-1 * |  | 4 B3g  | -0.1348<br>↑  | -0.12449<br>↓        | 7 B1u  |
| HOMO-2   |  | 3 Au   | -0.13921<br>↑ | -0.12733<br>↓        | 3 Au   |
| HOMO-3 * |  | 15 B2u | -0.15871<br>↑ | -0.14112<br>↓        | 5 B2g  |
| HOMO-4 * |  | 19 B3u | -0.17295      | -0.15880             | 15 B2u |



|          |                                                                                   |       |          |          |               |
|----------|-----------------------------------------------------------------------------------|-------|----------|----------|---------------|
| HOMO-5   | 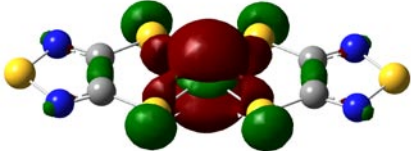 | 22 Ag | -0.17330 | -0.16496 | 22 Ag         |
| HOMO-6 * |  | 21 Ag | -0.19489 | -0.1729  | 19 <u>B3u</u> |
| HOMO-7 * |  | 5 B2g | -0.20344 | -0.18662 | 21 Ag         |

\* The drawings refer to the alfa orbitals symmetry.

**Table S5. [Ni(tdas)<sub>2</sub>]<sup>2-</sup> (2)**

| MO#     |                                                                                     | Symm          | E       |
|---------|-------------------------------------------------------------------------------------|---------------|---------|
| LUMO+3  | 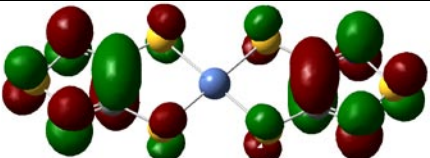   | 7 B2g         | 0.17879 |
| LUMO +2 |    | 23 Ag         | 0.17459 |
| LUMO +1 |    | 8 <u>B1u</u>  | 0.17061 |
| LUMO    |   | 14 <u>B1g</u> | 0.1594  |
| HOMO    |  | 6 B2g         | 0.04550 |
| HOMO-1  |  | 4 B3g         | 0.02587 |
| HOMO-2  |  | 22 Ag         | 0.01850 |
| HOMO-3  |  | 7 B1u         | 0.00738 |
| HOMO-4  |  | 3 Au          | 0.00543 |

|        |                                                                                    |               |          |
|--------|------------------------------------------------------------------------------------|---------------|----------|
| HOMO-5 | 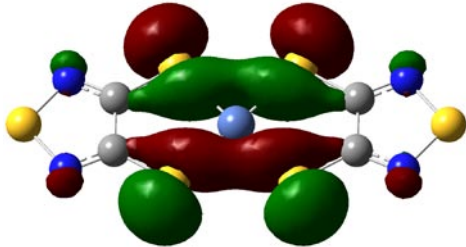  | 15 B2u        | -0.01213 |
| HOMO-6 |   | 5 B2g         | -0.01925 |
| HOMO-7 |   | 19 <u>B3u</u> | -0.02715 |
| HOMO-8 |   | 21 Ag         | -0.03237 |
| HOMO-9 |  | 3 <u>B3g</u>  | -0.03928 |

**Table S6.**  $[\text{Au}(\text{tdas})_2]^{1-}$  (3)

DFT B3LYP/SDD

Single Point Energy calculated on the basis of X-ray average data.

| MO#     |                                                                                     | Symm          | E        |
|---------|-------------------------------------------------------------------------------------|---------------|----------|
| LUMO+3  | 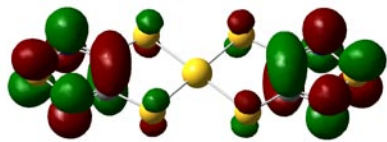   | 7 B2g         | 0.04751  |
| LUMO +1 |    | 7 <u>B1u</u>  | 0.04206  |
| LUMO    |   | 14 <u>B1g</u> | -0.00115 |
| HOMO    |  | 6 B2g         | -0.10651 |
| HOMO-1  |  | 4 B3g         | -0.13738 |
| HOMO-2  |  | 6 B1u         | -0.13993 |
| HOMO-3  |  | 3 Au          | -0.14557 |

|        |                                                                                     |              |          |
|--------|-------------------------------------------------------------------------------------|--------------|----------|
| HOMO-4 | 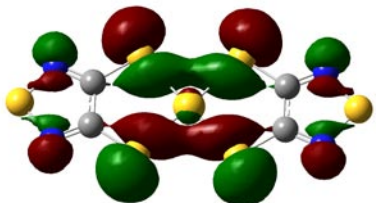   | B2u          | -0.16744 |
| HOMO-5 |    | <u>B3u</u>   | -0.18348 |
| HOMO-6 |    | 5 B2g        | -0.19602 |
| HOMO-7 |   | 5 <u>B1u</u> | -0.19845 |
| HOMO-9 |  | 4 B2g        | -0.21723 |
